# Supplementary material for: A wide-temperature-range sensor based on wide-strain-range self-healing and adhesive organogels
Source: Royal Society of Chemistry journal article supplement (doi:10.1039/d1nj04932a), 2021-12-08
Supplement: d1nj04932a1.pdf [file d1nj04932a1.pdf]

## Supporting information

### A wide temperature range sensor based on large range strain self-healing and adhesive organogel

Jun Ge,<sup>a†</sup> Shengping Dai,<sup>b†</sup> Xu Dong,<sup>a</sup> Meng li,<sup>a</sup> Yida Xu,<sup>a</sup> Yaoyao Jiang,<sup>a</sup> Ningyi Yuan<sup>a\*</sup> and Jianning Ding<sup>a,b\*</sup>

<sup>1</sup>Jiangsu Collaborative Innovation Center for Photovoltaic Science and Engineering, Jiangsu Province Cultivation base for State Key Laboratory of Photovoltaic Science and Technology, Changzhou University, Changzhou University, Changzhou 213164, P. R. China.

<sup>2</sup>Institute of Intelligent flexible Mechatronics, Jiangsu University, Zhenjiang, 212013, China.

<sup>†</sup> These authors contributed equally to this work. \* Email: dingjn@ujs.edu.cn; nyuan@cczu.edu.cn.

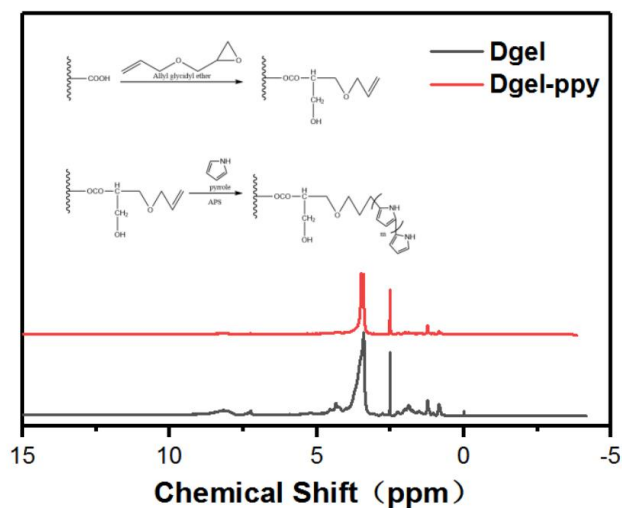

Fig. S1 <sup>1</sup>H NMR spectrum of conductive polymers Dgel and Dgel-ppy.

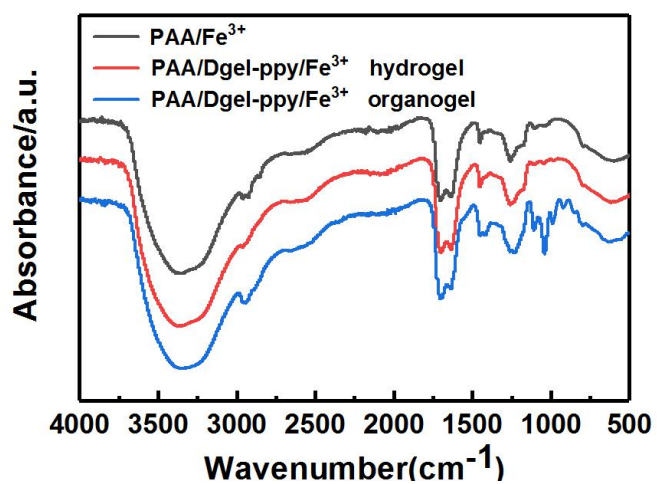

Fig. S2 FTIR spectra of PAA/Fe<sup>3+</sup> hydrogel, PAA/ Dgel-ppy /Fe<sup>3+</sup> hydrogel, PAA/Dgel-ppy /Fe<sup>3+</sup> organogel.

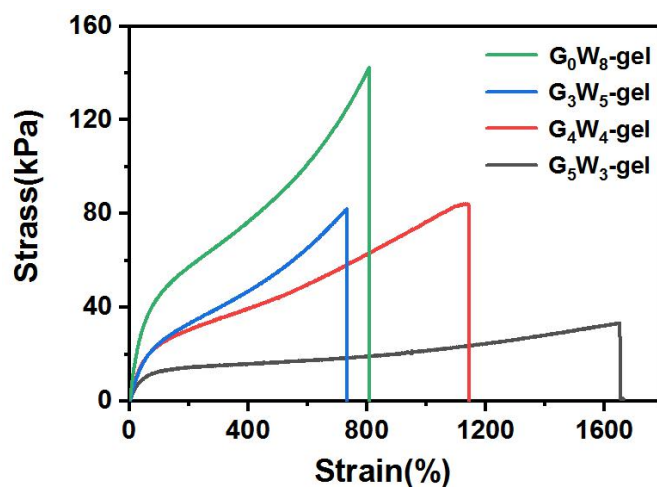

Fig. S3 Tensile properties of G<sub>x</sub>W<sub>y</sub> organogel (x and y are glycerol and water contents (mL))

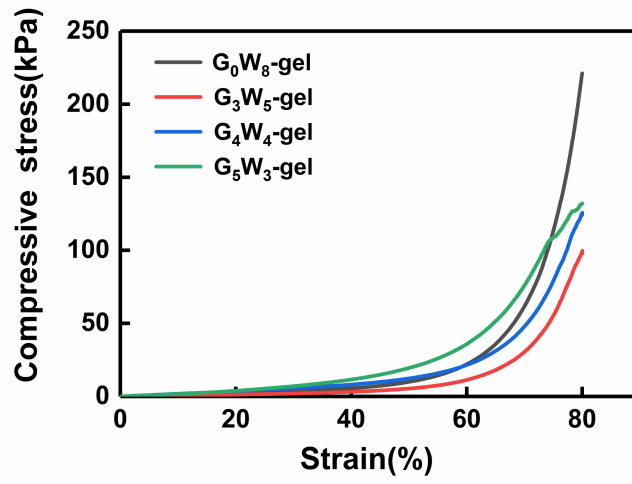

Fig. S4 Compression properties of G<sub>x</sub>W<sub>y</sub> organogel (x and y are glycerol and water contents (mL))
